# Supplementary material for: Synthesis of three-dimensional reduced graphene oxide layer supported cobalt nanocrystals and their high catalytic activity in F–T CO2 hydrogenation
Source: Royal Society of Chemistry journal article supplement (doi:10.1039/c3nr03038e), 2013-01-01
Supplement: c3nr03038e.pdf [file c3nr03038e.pdf]

## **Electronic Supporting Information**

### **Synthesis of three-dimensional reduced graphene oxide layer supported cobalt nanocrystals and its high catalytic activity in F-T CO<sub>2</sub> hydrogenation**

Fei He, Na Niu, Fengyu Qu, Shuquan Wei, Yujin Chen,<sup>\*</sup> Shili Gai, Peng Gao,<sup>\*</sup> Yan Wang, and  
Piaoping Yang<sup>\*</sup>

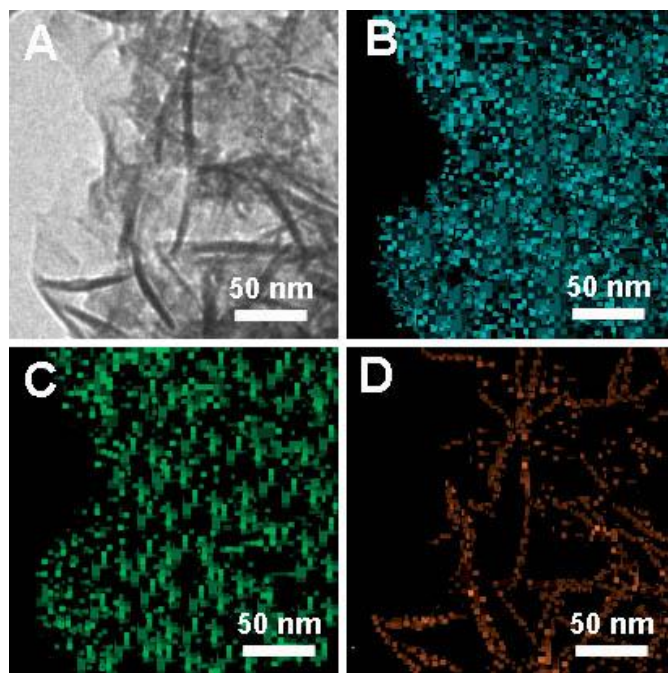

**Fig. S1.** TEM image (A), carbon (B), oxygen (C), and cobalt (D) element mapping of the Co/rGO composite fabricated at 220 °C.

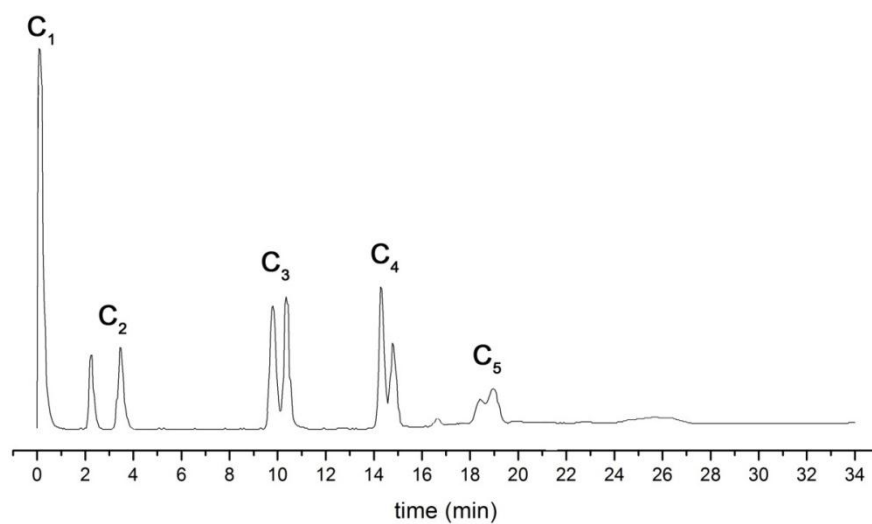

**Fig. S2.** The pattern of gases analysis by on-line chromatography of FID.

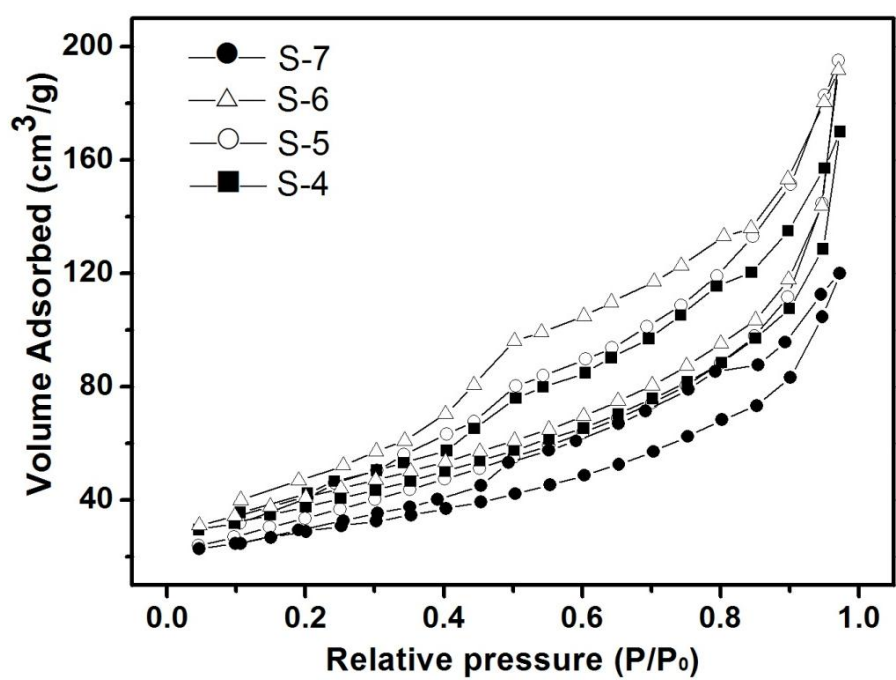

**Fig. S3.** Nitrogen adsorption/desorption isotherm of the Co/rGO composites (S-4, S-5, S-6, S-7).

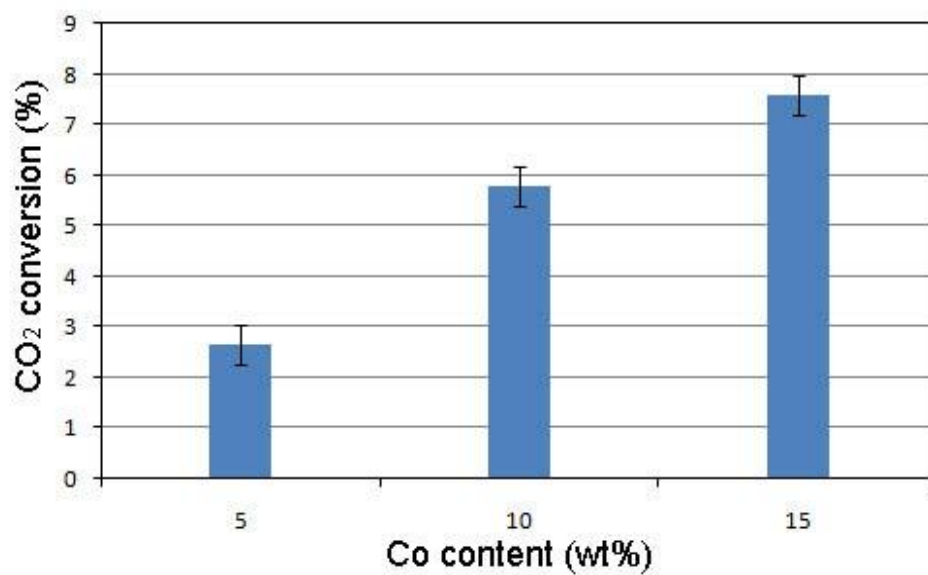

**Fig. S4.** Comparison catalysis activities of the composites prepared with different cobalt content (wt%) of 5, 10, 15 at synthesis temperature 220 °C for CO<sub>2</sub> hydrogenation reactions.

**Table S1.** Crystallite size, mass content of the Co metal in the Co/rGO catalysts (S-4, S-5, S-6, S-7) and the BET surface area of these catalysts

| Samples | Crystallite size (nm) | Co content (wt %) | BET surface area (m <sup>2</sup> /g) |
|---------|-----------------------|-------------------|--------------------------------------|
| S-4     | 20.7                  | 19.2              | 128                                  |
| S-5     | 23.7                  | 19.7              | 132                                  |
| S-6     | 24.9                  | 19.6              | 136                                  |
| S-7     | 23.9                  | 20.0              | 89                                   |

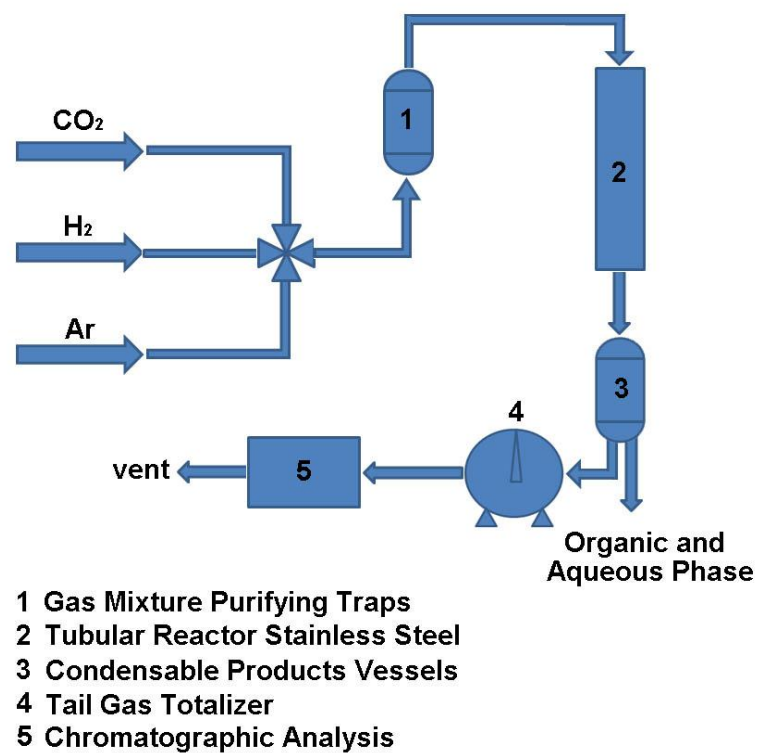

**Scheme S1.** CO<sub>2</sub> hydrogenation process by using the Co/rGO composite as the catalyst.
